# Supplementary material for: Phosphonium based ionic liquids-stabilizing or destabilizing agents for collagen?
Source: Royal Society of Chemistry journal article supplement (doi:10.1039/c5ra22441a), 2015-12-15
Supplement: c5ra22441a1.pdf [file c5ra22441a1.pdf]

## **Phosphonium based Ionic liquids – Stabilizing or Destabilizing Agent for Collagen?**

Aafiya Tarannum, Charuvaka Muvva, Ami Mehta, J. Raghava Rao, N. Nishad Fathima\*

*Chemical Laboratory, CSIR-Central Leather Research Institute, Adyar, Chennai 600020, India*

### **Corresponding Author**

Tel.: +91 44 24411630; fax: +91 44 24911589.

E-mail addresses: nishad@clri.res.in, nishad.naveed@gmail.com (N.N. Fathima).

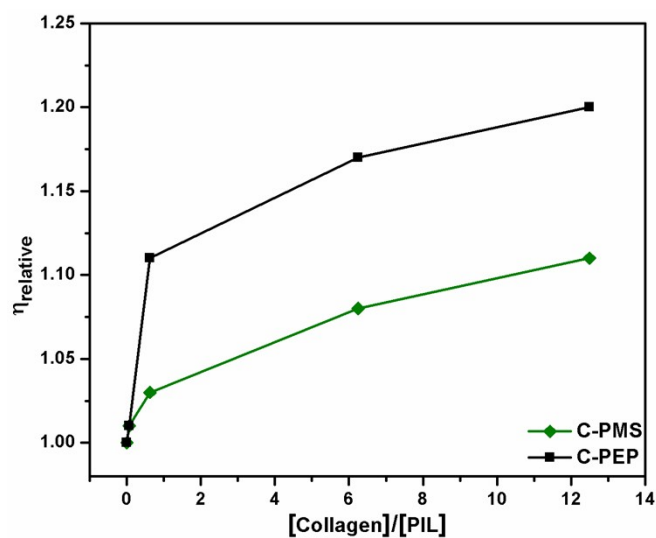

Figure S1. Plot of relative viscosity against  $1/R$ ,  $R = [\text{collagen}]/[\text{PIL}]$  (Temperature: 25°C), C-PEP (Collagen: Phosphonium diethyl phosphate), C-PMS (Collagen: Phosphonium methyl sulfate)

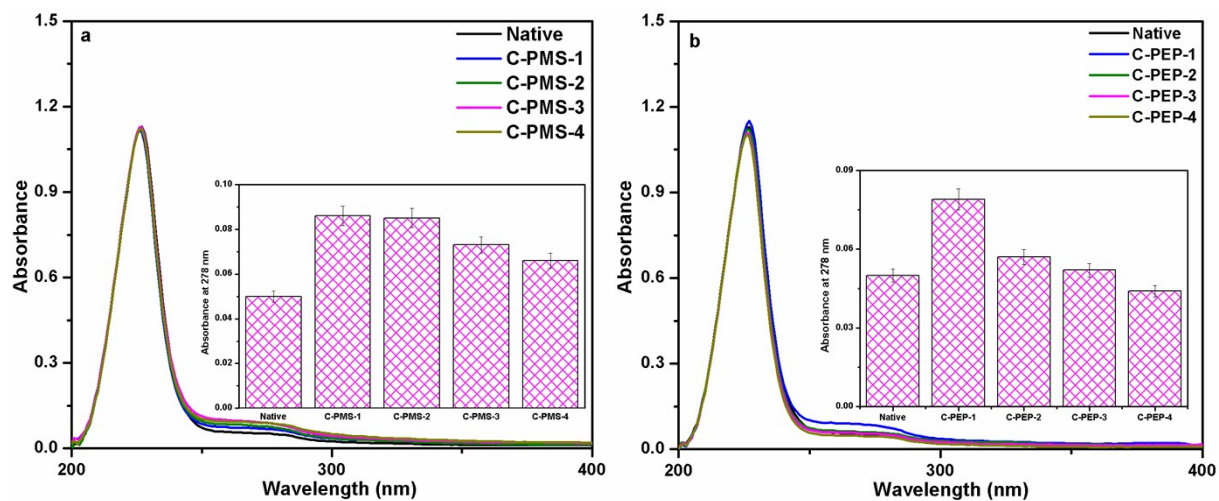

**Figure S2. UV – Vis spectra of collagen treated PILs (absorbance at 278 nm in the inset)**

**(a) C-PMS-1 to C-PMS-4 (Collagen: Phosphonium methyl sulfate 1:0.05% to 1:10%) (b) C-PEP-1 to C-PEP-4 (Collagen: Phosphonium diethyl phosphate 1:0.05% to 1:10%)**

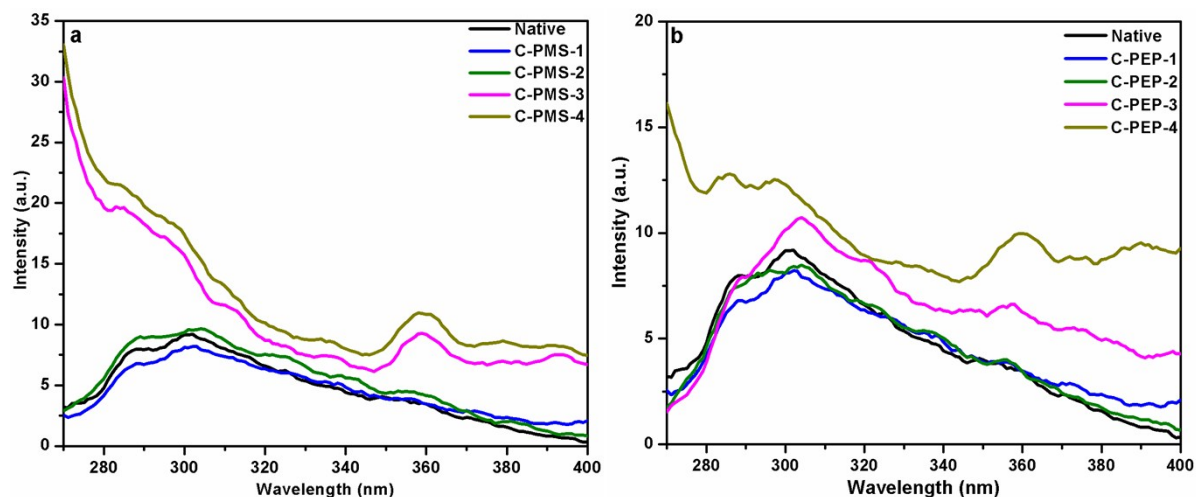

**Figure S3. Emission spectra of collagen treated PILs (a) C-PMS-1 to C-PMS-4 (Collagen: Phosphonium methyl sulfate 1:0.05% to 1:10%) (b) C-PEP-1 to C-PEP-4 (Collagen: Phosphonium diethyl phosphate 1:0.05% to 1:10%)**
